# Supplementary material
Source: PubMed Central journal article supplement (PMC7111316)
Supplement: mmc2.pdf [file mmc2.pdf]

**Microglia have a protective role in a mouse model of viral encephalitis-induced seizure development and hippocampal damage**

Inken Walzl<sup>1,2</sup>, Christopher Käufer<sup>1</sup>, Ingo Gerhauser<sup>3</sup>, Chintan Chhatbar<sup>4</sup>, Luca Ghita<sup>4</sup>, Ulrich Kalinke<sup>4</sup>, and Wolfgang Löscher<sup>1,2</sup>

**Supplemental Data**

Fig. S1

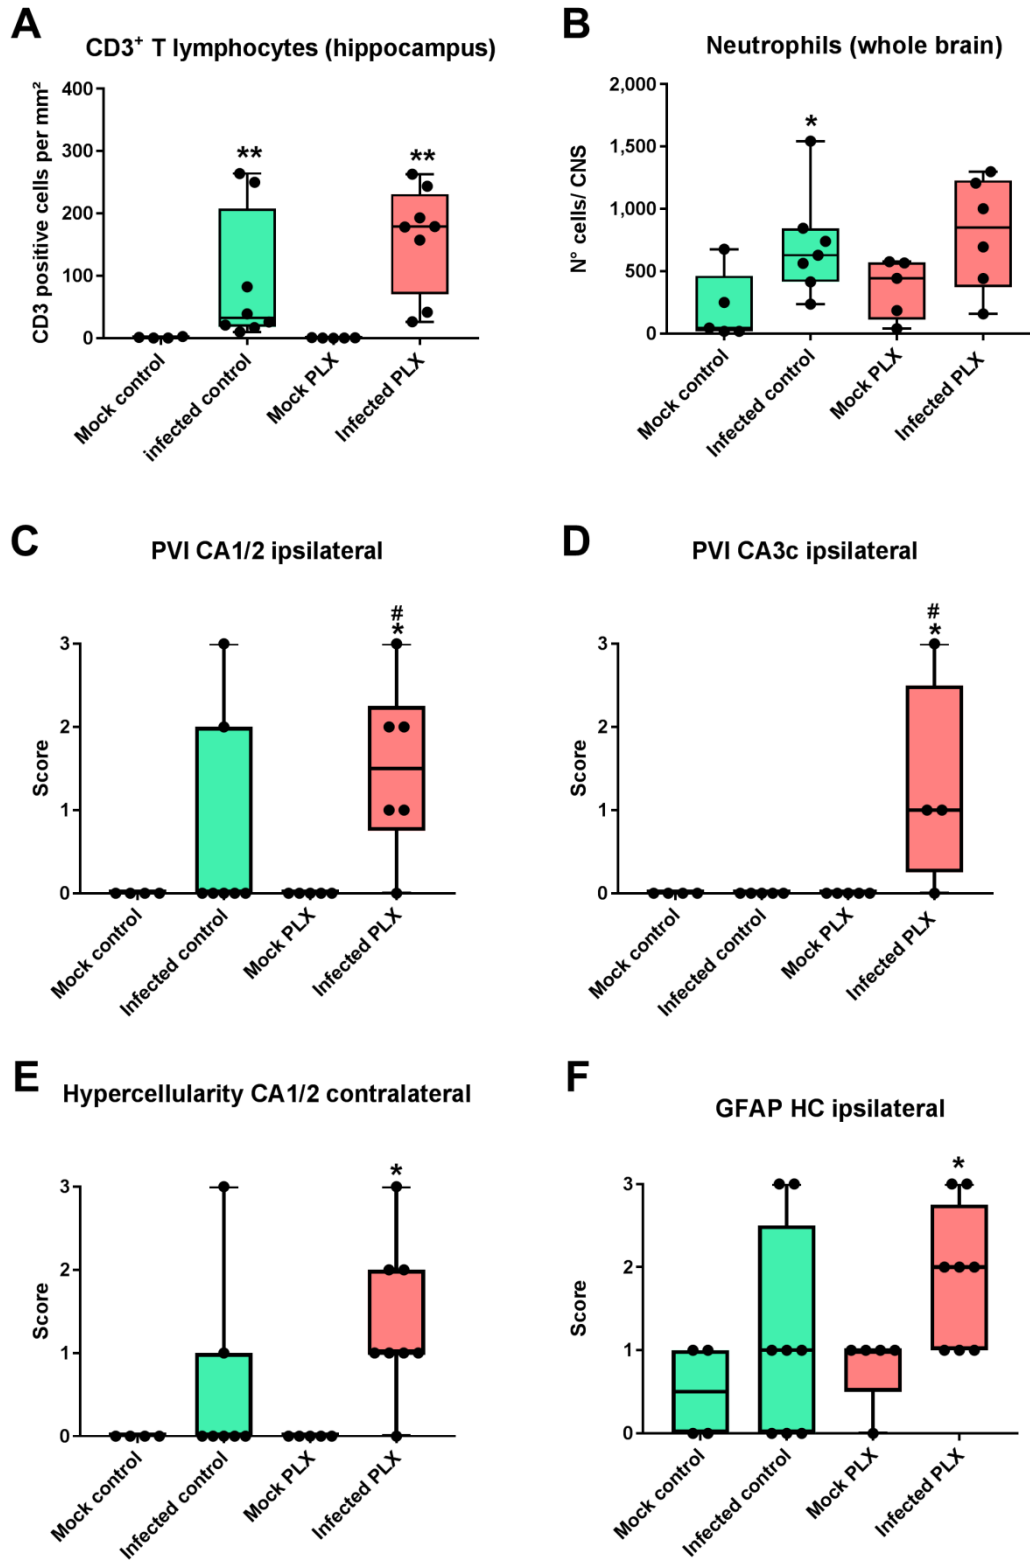

Fig. S1

Neuroinflammation as indicated by CD3<sup>+</sup> T cell (A) and neutrophil invasion (B),

**perivascular infiltrates (PVI; perivascular cuffing; C,D), hypercellularity (E), and astrogliosis (F).** Brain infiltration by CD3<sup>+</sup> cells and neutrophils was determined in the whole brain by flow cytometry, while PVI, hypercellularity, and GFAP were semiquantitatively analyzed by (immuno)histology in the hippocampus. Data are shown as boxplots with whiskers from minimum to maximal values; the horizontal line in the boxes represents the median value. In addition, individual data are shown. Sample size: 4 mock-infected controls; 5 mock-infected mice with PLX5622; 7-8 infected controls; 6-8 infected mice with PLX5622. Significant differences to mock-infected mice are indicated by asterisks (\*P<0.05; \*\*P<0.01) while significant differences between infected mice treated with PLX5622 and infected controls are indicated by the hash sign (#P<0.05).

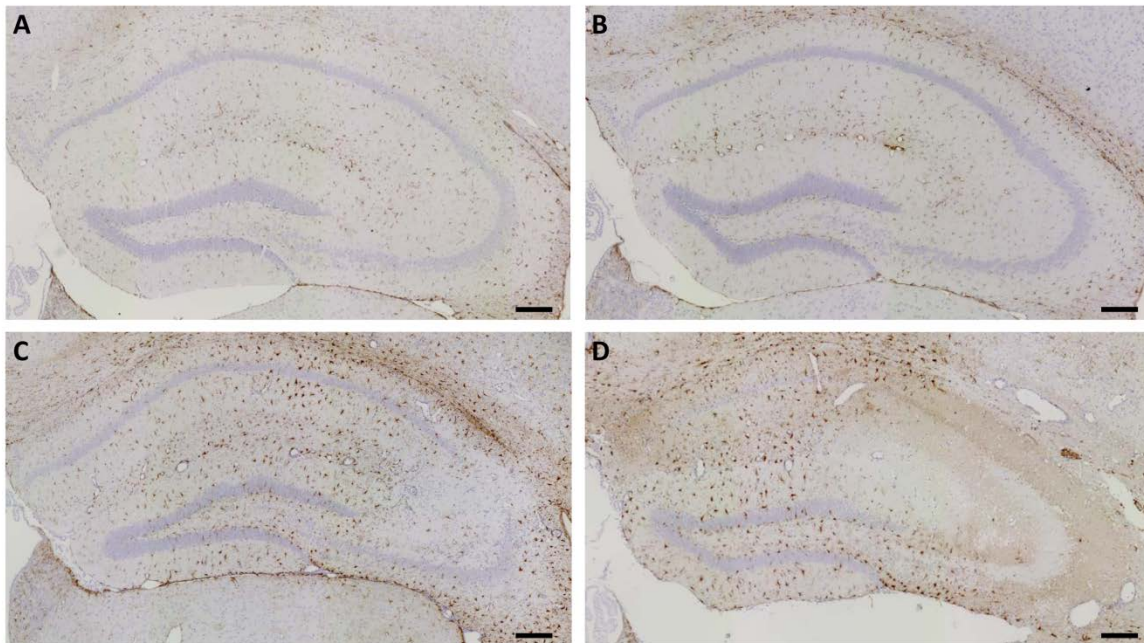

**Fig. S2**

**GFAP-labeled astrocytes in the ipsilateral hippocampal area.** Representative photomicrographs are shown for a mock-infected control (A), a mock-infected PLX5622-treated mouse (B), an infected control mouse (C), and an infected PLX5622-treated mouse (D). Note the increased GFAP labeling in the infected mice (C,D). See Fig. 8D for semiquantitative analysis of labeling. Scale bar in D = 200  $\mu$ m.

Fig. S3

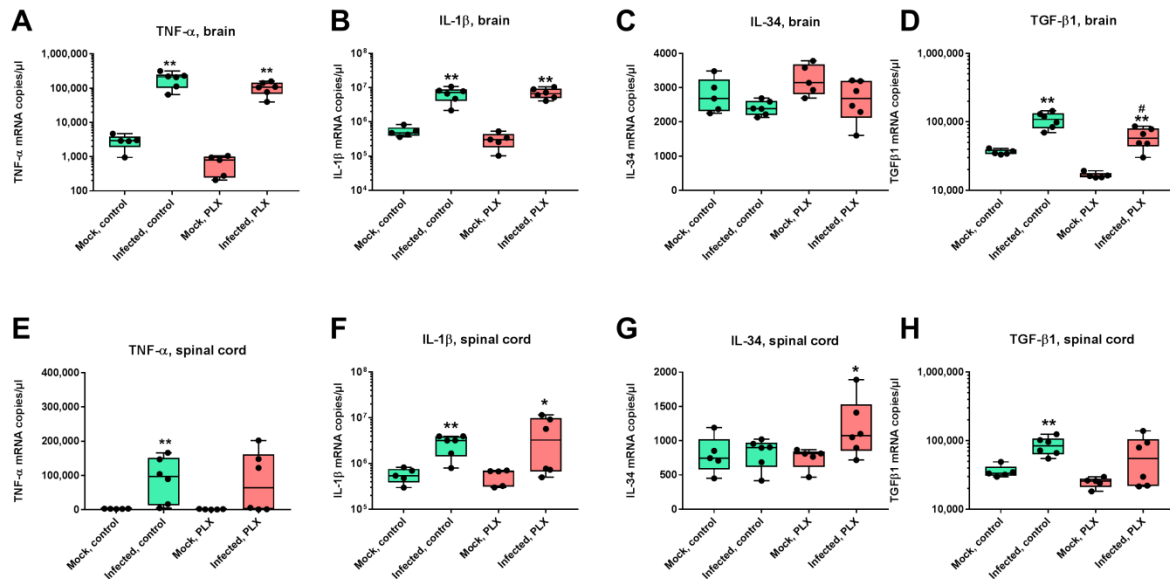

Fig. S3

**TNF- $\alpha$ , IL-1 $\beta$ , IL-34, and TGF- $\beta$ 1 mRNA expression in brain and spinal cord of infected mice.** Data are shown as boxplots with whiskers from minimum to maximal values; the horizontal line in the boxes represents the median value. Note that y-axis has a logarithmic scale. In addition, individual data are shown. Sample size is 5 for all noninfected mice and 6 for all infected mice. Significant differences to mock-infected mice are indicated by asterisks (\* $P$ <0.05; \*\* $P$ <0.01) while significant differences between infected mice treated with PLX5622 and infected controls are indicated by the hash sign (# $P$ <0.05; ## $P$ <0.01). (A) TNF- $\alpha$  mRNA expression in brain. (B) IL-1 $\beta$  mRNA expression in brain. (C) IL-34 mRNA expression in brain. (D) TGF- $\beta$ 1 mRNA expression in brain. (E) TNF- $\alpha$  mRNA expression in spinal cord. (F) IL-1 $\beta$  mRNA expression in spinal cord, (G) IL-34 mRNA expression in spinal cord, (H) TGF- $\beta$ 1 mRNA expression in spinal cord.

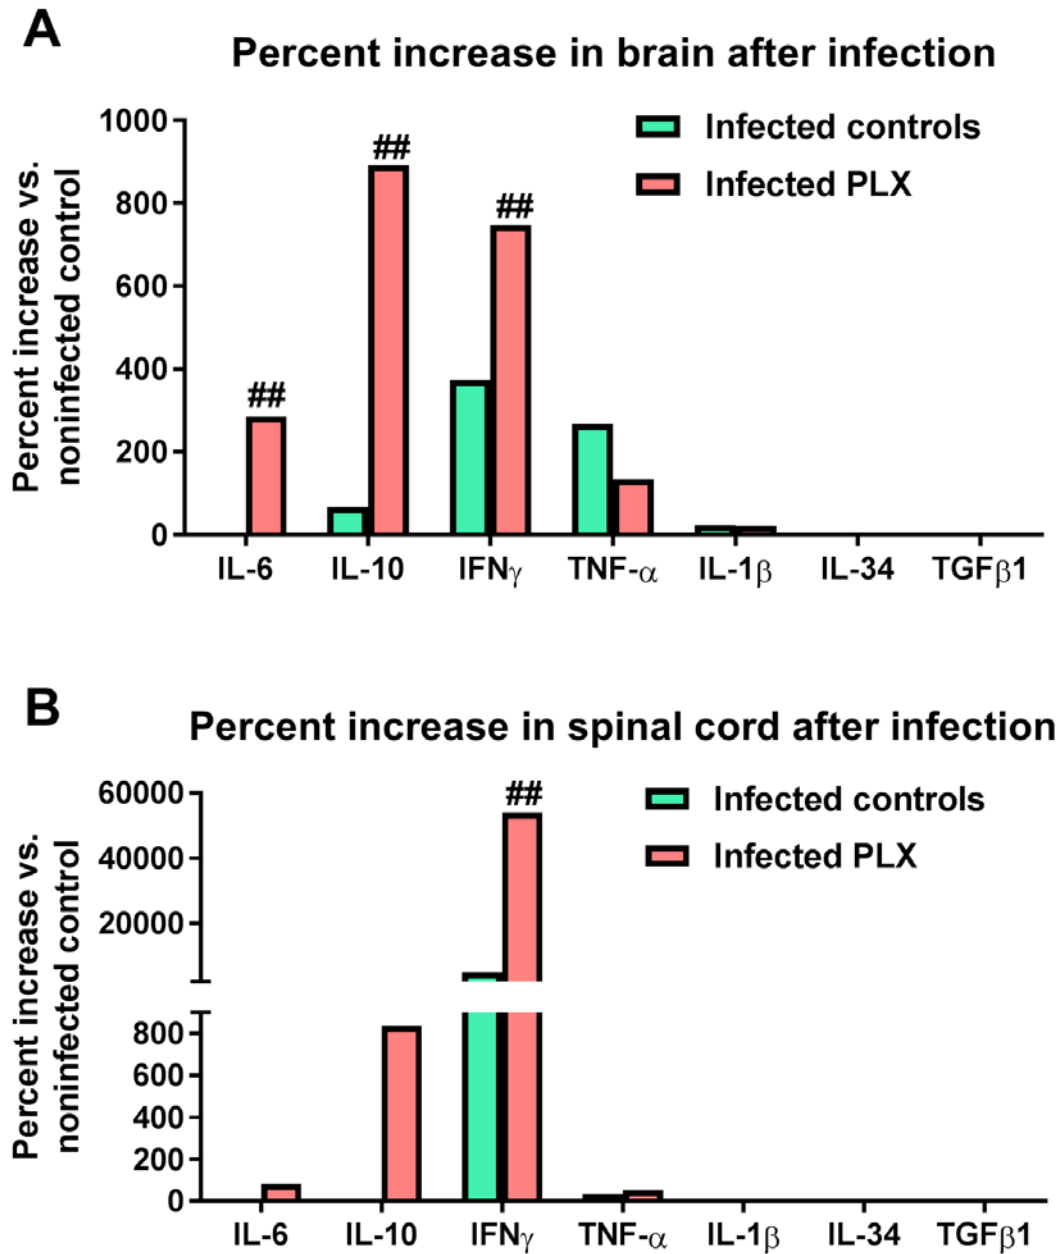

Fig. S4

Comparison of percent increase of cytokines in infected B6 controls versus infected mice treated with PLX5622 in brain (A) and spinal cord (B). Significant differences between infected mice treated with PLX5622 and infected controls are indicated by the hash sign ( $^{##}P < 0.01$ ). For details see Fig. 12 and Suppl. Fig. S3.

**Supplementary Table S1.** Overview of differences between infected controls and PLX5622-treated infected mice.

| Variable                              | TMEV-infected C57BL/6 mice (7 days after infection)                                               |                                                                                                                |
|---------------------------------------|---------------------------------------------------------------------------------------------------|----------------------------------------------------------------------------------------------------------------|
|                                       | Controls                                                                                          | PLX5622-treated                                                                                                |
| <b>Clinical symptoms</b>              |                                                                                                   |                                                                                                                |
| Seizures                              | Yes                                                                                               | Yes (increased vs. infected controls)                                                                          |
| Hindlimb paralysis                    | No                                                                                                | Yes                                                                                                            |
| Mortality                             | No                                                                                                | Yes                                                                                                            |
| <b>Brain alterations</b>              |                                                                                                   |                                                                                                                |
| TMEV antigen (IHC)                    | Present in CA1, CA2 and, less intense, cerebral cortex                                            | Present in all hippocampal subregions plus cerebral cortex, thalamus, hypothalamus, striatum and other regions |
| Microglia (FACS)                      | No difference to mock                                                                             | Depletion                                                                                                      |
| Monocytes (FACS)                      | Increase                                                                                          | Increase                                                                                                       |
| CD8 <sup>+</sup> T cells (FACS)       | Increase                                                                                          | Increase                                                                                                       |
| CD4 <sup>+</sup> T cells (FACS)       | Increase                                                                                          | Increase, but less than in infected controls                                                                   |
| CD3 <sup>+</sup> T cells (IHC)        | Increase in hippocampus                                                                           | Increase in hippocampus                                                                                        |
| Foxp3 <sup>+</sup> T cells (IHC)      | No significant increase                                                                           | Increase in hippocampus                                                                                        |
| Neutrophils (FACS)                    | Increase                                                                                          | No significant increase                                                                                        |
| Microglia (TMEM119 IHC)               | Increase                                                                                          | Depletion                                                                                                      |
| Mac-3 <sup>+</sup> cells (IHC)        | No significant increase in hippocampus, but cerebral cortex, thalamus and hypothalamus            | Significant increase in hippocampus, cerebral cortex, thalamus and hypothalamus                                |
| Iba1 <sup>+</sup> cells (IHC)         | Increase in CA1/2; both ramified and round shaped cells                                           | No increase in CA1/2, but increase in CA3c; only round shaped cells                                            |
| Iba1/Mac-3 double labeled cells (IHC) | Increase in Ca1/2 and CA3c                                                                        | Increase in Ca1/2 and CA3c                                                                                     |
| Perivascular infiltrates (H&E)        | No significant increase in CA1/2; increase in cortex, hypothalamus, thalamus, and corpus striatum | Increase in Ca1/2 and CA3c; increase in hypothalamus, thalamus, corpus striatum, vessel layer                  |
| Hypercellularity (H&E)                | No significant increase in CA1/2; increase in corpus striatum                                     | Increase in Ca1/2 and CA3c; increase in vessel layer, corpus striatum, cortex, hypothalamus, thalamus          |
| GFAP <sup>+</sup> cells (IHC)         | No increase in hippocampus                                                                        | Increase in hippocampus                                                                                        |
| NeuN (IHC)                            | Neurodegeneration in CA1 and CA2                                                                  | Neurodegeneration in CA1, CA2, CA3a, CA3c, dentate gyrus                                                       |
| FluoroJade C                          | Labeled cells in CA1/2 and, less frequently, CA3a                                                 | Labelled cells in all hippocampal regions                                                                      |
| Cytokines                             | Increase in TNF $\alpha$ , IL-6, IL-10, IFN $\gamma$ , IL-1 $\beta$ , TGF $\beta$ 1               | More marked increase in IL-6, IL-10 and IFN $\gamma$                                                           |
| <b>Spinal cord alterations</b>        |                                                                                                   |                                                                                                                |
| TMEV antigen (IHC)                    | No                                                                                                | Yes                                                                                                            |
| CD3 <sup>+</sup> T cells (IHC)        | Increase                                                                                          | More marked increase                                                                                           |
| Foxp3 <sup>+</sup> T cells (IHC)      | No significant increase                                                                           | Increase                                                                                                       |
| Neuronal necrosis                     | No                                                                                                | Yes                                                                                                            |
| Mac-3 <sup>+</sup> cells (IHC)        | Yes                                                                                               | Yes (more marked vs. infected controls)                                                                        |
| Perivascular infiltrates              | Not significant                                                                                   | Significant                                                                                                    |
| Cytokines                             | Increase in TNF $\alpha$ , IL-6, IL-10, IFN $\gamma$ , IL-1 $\beta$ , TGF $\beta$ 1               | Much more marked increase in IFN $\gamma$                                                                      |
| <b>Alterations in periphery</b>       |                                                                                                   |                                                                                                                |
| Monocytes in blood (FACS)             | Increase                                                                                          | Increase, but less than in infected controls                                                                   |
| Macrophages in spleen (FACS)          | Increase                                                                                          | Increase                                                                                                       |
